# Supplementary material
Source: Springer Nature journal article supplement (https://www.springermedizin.de/resource/supplementary/12883_2014_1052_MOESM1_ESM.pdf/9456438)
Supplement: MOESM1 [file 9456438]

| Region                                         | Anti-NMDA PET vs. controls<br>p | Anti- LGI1 PET vs. controls<br>p | Anti-NMDA PET vs. Anti-LGI1 PET<br>p |
|------------------------------------------------|---------------------------------|----------------------------------|--------------------------------------|
| Central right                                  |                                 |                                  | 0,0386                               |
| Central left                                   | 0,0375                          |                                  |                                      |
| Thalamus right                                 |                                 |                                  |                                      |
| Thalamus left                                  |                                 |                                  |                                      |
| Temporal right                                 |                                 |                                  |                                      |
| Temporal left                                  |                                 |                                  |                                      |
| Striat./Pall. right                            |                                 |                                  |                                      |
| Striat./Pall. Left                             |                                 |                                  |                                      |
| Parietal right                                 | 0,0166                          |                                  | 0,0026                               |
| Parietal left                                  | 0,0154                          |                                  | 0,0489                               |
| Occipital right                                |                                 |                                  |                                      |
| Occipital left                                 | 0,0493                          |                                  |                                      |
| mes. Temp. right                               | 0,0173                          |                                  |                                      |
| mes. Temp. Left                                | 0,0160                          |                                  |                                      |
| Frontal right                                  |                                 |                                  |                                      |
| Frontal left                                   |                                 | 0,0460                           |                                      |
| Cingulum right                                 |                                 |                                  |                                      |
| Cingulum left                                  | 0,0427                          | 0,0248                           |                                      |
| Cerebellum right                               |                                 |                                  |                                      |
| Cerebellum left                                |                                 | 0,0398                           |                                      |
| <b>Significant Hypometabolism in patients</b>  |                                 |                                  |                                      |
| <b>Significant Hypermetabolism in patients</b> |                                 |                                  |                                      |
